# Supplementary material for: Genomic landscape of DNA repair genes in cancer
Source: PubMed Central journal article supplement (PMC5029628; doi:10.18632/oncotarget.8196), 2016-03-19
Supplement: oncotarget-07-23312-s001.pdf [file oncotarget-07-23312-s001.pdf]

## Genomic landscape of DNA repair genes in cancer

### Supplementary Material

Supplemental Table 1: List of all 193 DNA repair genes analyzed. Classified as direct DNA repair genes or indirect regulators of genomic stability. Direct DNA repair genes further classified by involved repair pathway or pathways (1=BER, 2=MMR, 3=NER, 4=HR, 5=FA, 6=NHEJ, 7=DR).

| Direct DNA repair genes | DNA repair pathways |
|-------------------------|---------------------|
| <i>ATM</i>              | 4                   |
| <i>ATR</i>              | 5                   |
| <i>RPA1</i>             | 3, 4                |
| <i>RPA2</i>             | 3, 4                |
| <i>RPA3</i>             | 3, 4                |
| <i>RPA4</i>             | 3, 4                |
| <i>BRCA1</i>            | 4                   |
| <i>BRCA2</i>            | 4, 5                |
| <i>RAD51</i>            | 4                   |
| <i>RFC1</i>             | 1, 2, 3             |
| <i>RFC2</i>             | 1, 2, 3             |
| <i>RFC3</i>             | 1, 2, 3             |
| <i>RFC4</i>             | 1, 2, 3             |
| <i>RFC5</i>             | 1, 2, 3             |
| <i>XRCC1</i>            | 1                   |
| <i>PCNA</i>             | 1, 2, 3             |
| <i>PARP1</i>            | 1                   |
| <i>ERCC1</i>            | 3, 5                |
| <i>MSH3</i>             | 2                   |
| <i>PMS2</i>             | 2                   |
| <i>MLH1</i>             | 2                   |
| <i>MSH6</i>             | 2                   |
| <i>MSH2</i>             | 2                   |

|               |      |
|---------------|------|
| <i>MLH3</i>   | 2    |
| <i>EXO1</i>   | 2    |
| <i>NBN</i>    | 4    |
| <i>RAD50</i>  | 4    |
| <i>CHEK2</i>  | 4    |
| <i>FANCI</i>  | 5    |
| <i>FANCD2</i> | 5    |
| <i>FANCA</i>  | 5    |
| <i>FANCC</i>  | 5    |
| <i>FANCE</i>  | 5    |
| <i>FANCL</i>  | 5    |
| <i>FANCG</i>  | 5    |
| <i>FANCM</i>  | 5    |
| <i>ERCC4</i>  | 3    |
| <i>ERCC2</i>  | 3    |
| <i>ERCC5</i>  | 3    |
| <i>PARP2</i>  | 1    |
| <i>APEX1</i>  | 1    |
| <i>FEN1</i>   | 1    |
| <i>XPC</i>    | 3    |
| <i>ERCC6</i>  | 3    |
| <i>GTF2H2</i> | 3    |
| <i>ERCC3</i>  | 3    |
| <i>XPA</i>    | 3    |
| <i>RAD23B</i> | 3    |
| <i>PALB2</i>  | 4, 5 |
| <i>RAD51C</i> | 4, 5 |
| <i>XRCC6</i>  | 6    |

|               |         |
|---------------|---------|
| <i>XRCC5</i>  | 6       |
| <i>PRKDC</i>  | 6       |
| <i>XRCC4</i>  | 6       |
| <i>Lig4</i>   | 6       |
| <i>FANCB</i>  | 5       |
| <i>FANCF</i>  | 5       |
| <i>FAAP24</i> | 5       |
| <i>CHEK1</i>  | 5       |
| <i>BRIP1</i>  | 5       |
| <i>SLX4</i>   | 5       |
| <i>FAN1</i>   | 5       |
| <i>MUS81</i>  | 4, 5    |
| <i>EME1</i>   | 4, 5    |
| <i>POLE</i>   | 1, 3    |
| <i>POLD1</i>  | 1, 2, 3 |
| <i>MRE11A</i> | 4       |
| <i>RAD51D</i> | 4       |
| <i>RAD52</i>  | 4       |
| <i>RAD51B</i> | 4       |
| <i>PMS1</i>   | 2       |
| <i>RAD23A</i> | 3       |
| <i>LIG3</i>   | 1, 3    |
| <i>MGMT</i>   | 7       |
| <i>OGG1</i>   | 1       |
| <i>UNG</i>    | 1       |
| <i>SMUG1</i>  | 1       |
| <i>MBD4</i>   | 1       |
| <i>TDG</i>    | 1       |

|               |      |
|---------------|------|
| <i>MUTYH</i>  | 1    |
| <i>NTHL1</i>  | 1    |
| <i>MPG</i>    | 1    |
| <i>NEIL1</i>  | 1    |
| <i>NEIL2</i>  | 1    |
| <i>NEIL3</i>  | 1    |
| <i>APEX2</i>  | 1    |
| <i>PNKP</i>   | 1    |
| <i>APLF</i>   | 1    |
| <i>PARP3</i>  | 1    |
| <i>ALKBH2</i> | 7    |
| <i>ALKBH3</i> | 7    |
| <i>MSH4</i>   | 2    |
| <i>MSH5</i>   | 2    |
| <i>PMS2P3</i> | 2    |
| <i>CETN2</i>  | 3    |
| <i>DDB1</i>   | 3    |
| <i>DDB2</i>   | 3    |
| <i>GTF2H1</i> | 3    |
| <i>GTF2H3</i> | 3    |
| <i>GTF2H4</i> | 3    |
| <i>GTF2H5</i> | 3    |
| <i>CDK7</i>   | 3    |
| <i>CCNH</i>   | 3    |
| <i>MNAT1</i>  | 3    |
| <i>LIG1</i>   | 1, 3 |
| <i>ERCC8</i>  | 3    |
| <i>UVSSA</i>  | 3    |

|                                                                  |   |
|------------------------------------------------------------------|---|
| <i>XAB2</i>                                                      | 3 |
| <i>MMS19</i>                                                     | 3 |
| <i>DMC1</i>                                                      | 4 |
| <i>XRCC2</i>                                                     | 4 |
| <i>XRCC3</i>                                                     | 4 |
| <i>RAD54L</i>                                                    | 4 |
| <i>RAD54B</i>                                                    | 4 |
| <i>SHFM1</i>                                                     | 4 |
| <i>RBBP8</i>                                                     | 4 |
| <i>SLX1A</i>                                                     | 4 |
| <i>SLX1B</i>                                                     | 4 |
| <i>GEN1</i>                                                      | 4 |
| <i>FAAP20</i>                                                    | 5 |
| <i>DCLRE1C</i>                                                   | 6 |
| <i>NHEJ1</i>                                                     | 6 |
| <b>Indirectly associated genomic stability maintenance genes</b> |   |
| <i>PAXIP1</i>                                                    |   |
| <i>BLM</i>                                                       |   |
| <i>MLL3</i>                                                      |   |
| <i>CRIP1</i>                                                     |   |
| <i>CDK12</i>                                                     |   |
| <i>BAP1</i>                                                      |   |
| <i>BARD1</i>                                                     |   |
| <i>WRN</i>                                                       |   |
| <i>BUB1</i>                                                      |   |
| <i>CENPE</i>                                                     |   |
| <i>ZW10</i>                                                      |   |
| <i>TTK</i>                                                       |   |

|               |
|---------------|
| <i>KNTC1</i>  |
| <i>AURKB</i>  |
| <i>POLB</i>   |
| <i>POLH</i>   |
| <i>POLQ</i>   |
| <i>TDP1</i>   |
| <i>TDP2</i>   |
| <i>NUDT1</i>  |
| <i>DUT</i>    |
| <i>RRM2B</i>  |
| <i>POLG</i>   |
| <i>REV3L</i>  |
| <i>MAD2L2</i> |
| <i>REV1</i>   |
| <i>POLI</i>   |
| <i>POLK</i>   |
| <i>POLL</i>   |
| <i>POLM</i>   |
| <i>POLN</i>   |
| <i>TREX1</i>  |
| <i>TREX2</i>  |
| <i>APTX</i>   |
| <i>SPO11</i>  |
| <i>ENDOV</i>  |
| <i>UBE2A</i>  |
| <i>UBE2B</i>  |
| <i>RAD18</i>  |
| <i>SHPRH</i>  |

|                |
|----------------|
| <i>HLTF</i>    |
| <i>RNF168</i>  |
| <i>SPRTN</i>   |
| <i>RNF8</i>    |
| <i>RNF4</i>    |
| <i>UBE2V2</i>  |
| <i>UBE2N</i>   |
| <i>H2AFX</i>   |
| <i>CHAF1A</i>  |
| <i>SETMAR</i>  |
| <i>RECQL4</i>  |
| <i>MPLKIP</i>  |
| <i>DCLRE1A</i> |
| <i>DCLRE1B</i> |
| <i>PRPF19</i>  |
| <i>RECQL</i>   |
| <i>RECQL5</i>  |
| <i>HELQ</i>    |
| <i>RDM1</i>    |
| <i>NABP2</i>   |
| <i>ATRIP</i>   |
| <i>MDC1</i>    |
| <i>RAD1</i>    |
| <i>RAD9A</i>   |
| <i>HUS1</i>    |
| <i>RAD17</i>   |
| <i>TP53</i>    |
| <i>TP53BP1</i> |

|               |
|---------------|
| <i>TOPBP1</i> |
| <i>CLK2</i>   |
| <i>PER1</i>   |
